# Supplementary material for: Zookeepers’ Perception of Zoo Canid Welfare and its Effect on Job Satisfaction, Worldwide
Source: MDPI journal article supplement (doi:10.3390/ani10050916), 2020-05-25
Supplement: s1 [file s1]

1. Age

---

2. Gender

*Mark only one oval.*

☐ Male

☐ Female

3. In which country do you work?

---

4. How many years have you been working as a zookeeper?

---

5. What is your education level?

*Mark only one oval.*

☐ High school

☐ University

☐ Post-graduate studies

☐ None of them

6. Have you ever attended courses on animal welfare or welfare-related topics?

*Mark only one oval.*

☐ Yes

☐ No

7. How long have you worked/been working with captive canid species?

---

8. To date, do you still work as a canid keeper?

*Mark only one oval.*

☐ Yes

☐ No

9. Did you specifically choose to work with wild canid species?

*Mark only one oval.*

☐ Yes

☐ No

10. How many zoos have you worked in?

---

11. Why did you first choose to work as a keeper?

*Tick all that apply.*

- ☐ Love for animals
- ☐ Money
- ☐ Interest in species conservation
- ☐ Favourable working shifts
- ☐ Introduced by an acquaintance who already worked in the sector
- ☐ Only job found

Other: ☐ \_\_\_\_\_

12. Have you ever owned a dog?

*Mark only one oval.*

- ☐ Yes
- ☐ No

13. Which group of canids do you take care of?

*Tick all that apply.*

- ☐ African wild dog
- ☐ Coyote
- ☐ Fox
- ☐ Jackal
- ☐ Wolf
- ☐ Cuon
- ☐ Raccoon dog
- ☐ Bush dog
- ☐ Maned wolf

Other: ☐ \_\_\_\_\_

14. On average, how much time (minutes) per day do you spend around (visual contact) the canids you take care of?

\_\_\_\_\_
